# Supplementary material for: Immunological age prediction in HIV-infected, ART-treated individuals
Source: Aging (Albany NY). 2021 Oct 11;13(19):22772–91. doi: 10.18632/aging.203625 (PMC8544329; doi:10.18632/aging.203625)
Supplement: Supplementary Tables 3 and 4 [file aging-13-203625-s003.xlsx]

## Sheet: Supplementary Table 3
Supplementary Table 3. Spearman correlation results for univariate analysis of parameter with age in HC.
Immune Parameter	Coefficient	p value
MCP1	0.32532	0.000799304
TNFA	0.301883	0.00194161
sICAM	0.219822	0.0256753
neopterin	0.282887	0.00378755
sCD25	0.25739	0.00867193
sCD163	0.231205	0.0187851
D-Dimer	0.20008	0.0427296
IL17a	-0.215727	0.0286325
IL1B	-0.19925	0.0436156
CD4/T CM/ CD38- , HLADR- (%)	0.340675	0.000429556
CD4/T CM/TFH CD38 MFI	-0.452606	1.58683e-06
CD4/T CM/TFH/CD38 (%)	-0.387146	5.34811e-05
CD4/T CM/TFH/ICOS (%)	-0.31223	0.00132374
CD4/CD38 (%)	-0.396293	3.41544e-05
CD4/T CM/TFH/PD1 (%)	-0.207159	0.0357633
CD4/T CM/TFH/ CD38+ , HLADR+ (%)	-0.216441	0.0280968
CD4/T CM/TFH/ CD38+ , HLADR- (%)	-0.397975	3.14048e-05
CD4/T CM/TFH/ CD38- , HLADR- (%)	0.344901	0.000360034
CD4/T CM/TFH/TH1 (%)	-0.198375	0.044566
CD4/T CM/TFH/TH1 CD38 MFI	-0.335241	0.000537096
CD4/T CM/TFH/TH1/CD38 (%)	-0.255345	0.00923727
CD4/T CM/TFH/TH1/ CD38+ , HLADR- (%)	-0.256923	0.00879841
CD4/T CM/TFH/TH1/ CD38- , HLADR- (%)	0.249876	0.0109112
CD4/T CM/TFH/TH1-TH17 CD38 MFI	-0.270004	0.00581158
CD4/T CM/TFH/TH1-TH17/CD38 (%)	-0.247012	0.0118893
CD4/T CM/TFH/TH1-TH17/ICOS (%)	-0.242187	0.013711
CD4/T CM/TFH/TH1-TH17/PD1 (%)	-0.209969	0.0332764
CD4/KI67 (%)	0.207764	0.0352148
CD4/T CM/TFH/TH1-TH17/ CD38+ , HLADR- (%)	-0.367089	0.000136665
CD4/T CM/TFH/TH1-TH17/ CD38- , HLADR- (%)	0.275217	0.00489879
CD4/T CM/TFH/TH2 CD38 MFI	-0.431462	5.36012e-06
CD4/T CM/TFH/TH2/CD38 (%)	-0.366521	0.000140221
CD4/T CM/TFH/TH2/ICOS (%)	-0.297632	0.00226357
CD4/T CM/TFH/TH2/KI67 (%)	0.243591	0.0131574
CD4/T CM/TFH/TH2/ CD38- , HLADR+ (%)	0.201708	0.0410343
CD4/T CM/TFH/TH2/ CD38+ , HLADR- (%)	-0.401806	2.58981e-05
CD4/T CM/TFH/TH2/ CD38- , HLADR- (%)	0.315896	0.00115191
CD4/T CM/TFH/TH17 (%)	0.226021	0.0216953
CD4/T CM/TFH/TH17 CD38 MFI	-0.428103	6.45557e-06
CD4/T CM/TFH/TH17/CD38 (%)	-0.346675	0.000334053
CD4/T CM/TFH/TH17/ICOS (%)	-0.340348	0.000435423
CD4/T CM/TFH/TH17/KI67 (%)	0.317247	0.00109393
CD4/T CM/TFH/TH17/ CD38+ , HLADR- (%)	-0.371341	0.000112585
CD4/T CM/TFH/TH17/ CD38- , HLADR- (%)	0.26791	0.00621889
CD4/T TM CD38 MFI	-0.294003	0.00257568
CD4/T TM PD1 MFI	-0.335696	0.000527223
CD4/T TM/CD38 (%)	-0.279228	0.00428592
CD4/T TM/KI67 (%)	0.240193	0.0145323
CD4/T TM/PD1 (%)	-0.330882	0.000640659
CD4/T TM/ CD38+ , HLADR- (%)	-0.443055	2.7779e-06
CD4/ CD38- , HLADR+ (%)	0.229325	0.0197989
CD4/ CD38+ , HLADR- (%)	-0.386117	5.62028e-05
CD4/ CD38- , HLADR- (%)	0.400147	2.81615e-05
CD4/T NAIVE CD38 MFI	-0.318141	0.00105702
CD4/T NAIVE/CD38 (%)	-0.293573	0.00261512
CD4/T NAIVE/ICOS (%)	-0.237135	0.0158742
CD4/T NAIVE/KI67 (%)	0.241861	0.0138426
CD4/T NAIVE/ CD38- , HLADR+ (%)	0.298242	0.00221458
CD4T CM CD38 MFI	-0.464995	7.48007e-07
CD4/T NAIVE/ CD38+ , HLADR- (%)	-0.317064	0.00110163
CD4/T NAIVE/ CD38- , HLADR- (%)	0.30922	0.00148188
CD4/T EFF/CD38 (%)	-0.216602	0.0279776
CD4/T EFF/PD1 (%)	-0.280434	0.00411557
CD4/T EFF/ CD38+ , HLADR- (%)	-0.272642	0.00533243
CD4/TCM/CD38 (%)	-0.423876	8.13491e-06
CD4/T EM CD38 MFI	-0.242153	0.0137249
CD4/T EM PD1 MFI	-0.271804	0.00548071
CD4/T EM/CD38 (%)	-0.234388	0.0171701
CD4/T EM/ICOS (%)	-0.263026	0.00726862
CD4/T EM/PD1 (%)	-0.315273	0.00117963
CD4/T EM/ CD38+ , HLADR- (%)	-0.268951	0.00601337
CD8 ICOS MFI	0.223935	0.0229709
CD8 CD38 MFI	-0.463864	8.02174e-07
CD8 PD1 MFI	0.265315	0.00675854
CD8/CD38 (%)	-0.401538	2.62514e-05
CD8/ICOS (%)	0.205824	0.0369983
CD4/T CM/ICOS (%)	-0.247538	0.0117043
CD8/T CM ICOS MFI	0.332005	0.000612348
CD8/T CM CD38 MFI	-0.558535	8.75453e-10
CD8/T CM PD1 MFI	0.306572	0.00163493
CD8/T CM/CD38 (%)	-0.536508	5.18078e-09
CD8/T CM/ICOS (%)	0.249086	0.0111737
CD8/T CM/ CD38- , HLADR+ (%)	0.375876	9.12847e-05
CD8/T CM/ CD38+ , HLADR+ (%)	-0.209105	0.034025
CD8/T CM/ CD38+ , HLADR- (%)	-0.555054	1.16956e-09
CD8/T CM/ CD38- , HLADR- (%)	0.320751	0.000955621
CD8/T TM CD38 MFI	-0.20631	0.0365444
CD8/T TM/ICOS (%)	0.2001	0.0427079
CD8/ CD38- , HLADR+ (%)	0.344498	0.000366175
CD8/ CD38+ , HLADR- (%)	-0.469341	5.7049e-07
CD8/ CD45RO- , CD27+ CD38 MFI	-0.38025	7.4352e-05
CD8/ CD45RO- , CD27+/CD38 (%)	-0.308232	0.0015374
CD8/ CD45RO- , CD27+/ICOS (%)	0.24059	0.0143652
CD8/ CD45RO- , CD27+/KI67 (%)	0.230657	0.0190759
CD8/ CD45RO- , CD27+/ CD38- , HLADR+ (%)	0.307308	0.001591
CD8/ CD45RO- , CD27+/ CD38+ , HLADR- (%)	-0.364727	0.000152019
CD4/T CM/NONTFH CD38 MFI	-0.387946	5.14522e-05
CD8/T EFF CD38 MFI	-0.236289	0.0162639
CD8/T EFF/CD38 (%)	-0.250082	0.0108437
CD8/T EFF/PD1 (%)	-0.275186	0.00490387
CD4/T CM/NONTFH PD1 MFI	-0.199065	0.0438147
CD8/T EFF/ CD38+ , HLADR- (%)	-0.237933	0.0155142
CD8/T EM CD38 MFI	-0.313042	0.0012838
CD8/T EM/CD38 (%)	-0.350244	0.000286966
CD4/T CM/NONTFH/CD38 (%)	-0.3759	9.1184e-05
CD8/T EM/ CD38+ , HLADR+ (%)	-0.322106	0.000906587
CD8/T EM/ CD38+ , HLADR- (%)	-0.254618	0.00944581
CD4/T CM/NONTFH/ICOS (%)	-0.255719	0.00913159
CD4/T CM/NONTFH/PD1 (%)	-0.296833	0.00232914
CD4/T CM/NONTFH/CD38+ , HLADR+ (%)	-0.328828	0.000695537
CD4/T CM/NONTFH/CD38+ , HLADR- (%)	-0.351034	0.0002774
CD4/T CM/NONTFH/CD38- , HLADR-(%)	0.322741	0.00088441
CD4/T CM/NONTFH/TH1 (%)	-0.203611	0.039125
CD4/T CM/NONTFH/TH1 HLADR MFI	-0.208738	0.0343474
CD4/T CM/NONTFH/TH1 CD38 MFI	-0.291693	0.00279407
CD4/T CM/NONTFH/TH1 PD1 MFI	-0.274626	0.00499545
CD4/T CM/NONTFH/TH1/CD38 (%)	-0.292941	0.00267414
CD4/T CM/NONTFH/TH1/ PD1(%)	-0.255506	0.0091915
CD4/T CM/NONTFH/TH1: CD38+ , HLADR+ (%)	-0.209983	0.0332638
CD4/T CM/NONTFH/TH1: CD38+ , HLADR- (%)	-0.296045	0.00239562
CD4/T CM/NONTFH/TH1: CD38- , HLADR- (%)	0.293749	0.00259892
CD4/T CM/NONTFH/TH1-TH17 (%)	-0.197246	0.0458182
CD4/T CM/NONTFH/TH1-TH17 PD1 MFI	-0.273497	0.0051848
CD4/CD8 Ratio	0.195735	0.0475394
CD4/T CM/NONTFH/TH1-TH17/PD1 (%)	-0.299481	0.00211799
CD4/T CM/NONTFH/TH1-TH17/CD38+ , HLADR- (%)	-0.200579	0.0422035
CD4/T CM/NONTFH/TH2 (%)	0.269168	0.00597129
CD4/T CM/NONTFH/TH2 CD38 MFI	-0.342942	0.000390858
CD4/T CM/NONTFH/TH2/CD38 (%)	-0.317389	0.00108796
CD4/T CM/NONTFH/TH2/ICOS (%)	-0.300581	0.00203546
CD4/T CM/NONTFH/TH2/KI67 (%)	0.26154	0.00761759
CD4/T CM/NONTFH/TH2/ CD38+ , HLADR+ (%)	-0.204068	0.038678
CD4/T CM/NONTFH/TH2/ CD38+ , HLADR- (%)	-0.303826	0.00180873
CD4/T CM/NONTFH/TH2/ CD38- , HLADR- (%)	0.314152	0.00123094
CD4/T CM/NONTFH/TH17 CD38 MFI	-0.25518	0.00928417
CD4/T CM/NONTFH/TH17 PD1 MFI	-0.215493	0.0288101
CD4/T CM/NONTFH/TH17/CD38 (%)	-0.206664	0.0362172
CD4/T CM/NONTFH/TH17/ICOS (%)	-0.242545	0.0135683
CD4 CD38 MFI	-0.42177	9.11754e-06
CD4/T CM/NONTFH/TH17/KI67 (%)	0.250955	0.0105612
CD4/T CM/NONTFH/TH17/PD1 (%)	-0.261315	0.0076718
CD4/T CM/NONTFH/TH17/ CD38+ , HLADR- (%)	-0.22898	0.0199899
CD4/T CM/PD1 (%)	-0.283662	0.00368879
CD4/T CM/ CD38+ , HLADR+ (%)	-0.317288	0.00109218
CD4/T CM/ CD38+ , HLADR- (%)	-0.41858	1.08212e-05
CD4 TCM/TFH/KI67	-0.24223	0.0136939
CD4 TCM/TFH/PD1	-0.244298	0.0128861
CD4 TCM/TFH/TFR CTLA4 MFI	-0.198579	0.0443429
CD4 TCM/TFH/TFR PD1 MFI	-0.309246	0.00148042
CD4 TCM/TFH/TFR/CD39	-0.229829	0.0195227
CD4 BCL6	-0.215403	0.0288785
CD4 TCM/TFH/TFR/PD1	-0.275755	0.0048124
CD4 TEFF PD1 MFI	-0.317599	0.00107922
CD4 TEFF/CTLA4	-0.299904	0.00208593
CD4 TEFF/KI67	-0.321836	0.000916174
CD4 TEFF/PD1	-0.293962	0.00257944
CD4 TEM PD1 MFI	-0.374005	9.95724e-05
CD4 TEM/CD127	-0.202526	0.0402045
CD4 TEM/KI67	-0.312738	0.00129862
CD4 TEM/PD1	-0.32208	0.000907517
CD8 CD39 MFI	-0.196664	0.0464749
CD8/CD127	-0.262691	0.00734592
CD8/CTLA4	-0.249216	0.01113
CD8/NAIVE CD39 MFI	-0.230671	0.0190684
CD8/NAIVE/CD127	-0.252229	0.010161
CD8/NAIVE/KI67	-0.200294	0.0425032
CD8/TCM/CD127	-0.315746	0.00115852
CD8/TCM/CTLA4	-0.227025	0.0211032
CD8/TCM/KI67	-0.339805	0.00044532
CD8/TEFF PD1 MFI	-0.248814	0.0112652
CD8/TEFF/PD1	-0.199966	0.0428501
CD4 CD127	-0.239935	0.0146414
CD4KI67	-0.199272	0.0435918
CD4 NAIVE/CD127	-0.193706	0.049935
CD4 NAIVE/CTLA4	-0.264474	0.00694205
CD4 NAIVE/KI67	-0.276185	0.00474419
CD4 PD1	-0.226117	0.021638
CD4 TCM PD1 MFI	-0.310823	0.00139562
CD4 TCM/BCL6	-0.197067	0.0460195
CD4 TCM/CTLA4	-0.251424	0.0104124
CD4 TCM/KI67	-0.295194	0.00246917
CD4 TCM/NONTFH PD1 MFI	-0.319988	0.000984316
CD4 TCM/NONTFH/CTLA4	-0.233777	0.0174705
CD4 TCM/NONTFH/KI67	-0.295398	0.00245137
CD4 TCM/NONTFH/MEMORY TREG PD1 MFI	-0.303687	0.00181793
CD4 TCM/NONTFH/MEMORY TREG/KI67	-0.263904	0.00706897
CD4 TCM/NONTFH/MEMORY TREG/PD1	-0.349221	0.000299798
CD4 TCM/NONTFH/PD1	-0.29331	0.00263953
CD4 TCM/TFH PD1 MFI	-0.210003	0.0332469
CD4 TCM/TFH/CD39	-0.213935	0.0300145
CD4 TCM/TFH/CTLA4	-0.203935	0.0388073
CD8/T NAIVE/CD28 (%)	0.357259	0.000211747
CD8/T NAIVE/CD57 (%)	0.251253	0.0104663
CD4/LAG3 (%)	0.214727	0.0293973
CD8/T NAIVE/TIGIT (%)	0.285675	0.00344321
CD8/TBET (%)	0.203563	0.0391726
CD8/TIGIT (%)	0.296782	0.00233346
CD8/LAG3- (%)	-0.234477	0.0171267
CD8/TIGIT- (%)	-0.297131	0.00230447
CD8/2B4+LAG3+PD1+TIGIT+TIM3- (%)	0.227662	0.0207346
CD8/2B4+LAG3+PD1-TIGIT+TIM3+ (%)	0.198552	0.044372
CD8/2B4-LAG3+PD1+TIGIT+TIM3+ (%)	0.195338	0.0480005
CD8/2B4-LAG3+PD1-TIGIT+TIM3- (%)	0.355597	0.000227707
CD8/2B4-LAG3-PD1-TIGIT+TIM3- (%)	0.224338	0.0227199
CD4/T CM/PD1 (%)	-0.209239	0.0339079
CD4/T NAIVE/2B4 (%)	0.327271	0.000739964
CD4/T NAIVE/LAG3 (%)	0.242745	0.0134888
CD8/LAG3 (%)	0.237846	0.0155531
CD8/T CM/CD28 (%)	0.33552	0.000531019
CD8/T EFF/CD57 (%)	0.201283	0.0414714
CD8/T EFF/LAG3 (%)	0.202677	0.0400527
CD8/T EFF/TBET (%)	0.213009	0.0307507
CD8/T EFF/TIGIT (%)	0.232383	0.0181727
TOTAL CD4 R6+R3- TH17	0.270154	0.00578331
TOTAL CD4 R6+R3- TH17 CCR5 MFI	0.204692	0.0380737
TOTAL CD4 R6+R3- TH17 PD1	-0.195331	0.0480092
TOTAL CD4 R6-R3-R4+ TH2	0.337831	0.000483093
Th2 % of CD4	0.268647	0.00607277
CD8	-0.210411	0.0328988
TOTAL CD4	0.244182	0.0129302
TOTAL CD4 CCR5 MFI	0.208179	0.0348429
TOTAL CD4 CD95 MFI	0.304793	0.00174568
TOTAL CD4 R0- 27+ NAIVE	-0.309943	0.00144238
TOTAL CD4 R0- 27+ NAIVE CD95 MFI	0.332729	0.000594727
TOTAL CD4 R0+ 27+ TCM	0.295025	0.00248407
TOTAL CD4 R0+ 27+ TCM CCR7	0.227021	0.0211058
TOTAL CD4 R0+ 27+ TCM NON TFH	0.265495	0.00671974
TOTAL CD4 R0+ 27+ TCM NON TFH CD95	-0.211355	0.0321041
TOTAL CD4 R0+ 27+ TCM NON TFH PD1	-0.201049	0.0417137
TOTAL CD4 R0+ 27+ TCM TFH	-0.262444	0.00740344
TOTAL CD4 R0+ 27+ TCM TFH CCR5 MFI	0.231934	0.0184043
TOTAL CD4 R0+ 27+ TCM TFH CD95 MFI	0.200481	0.0423067
TOTAL CD4 R0+ 27+ TCM TFH R6-R3+ TH1 CCR5 MFI	0.208103	0.0349112
TOTAL CD4 R0+ 27+ TCM TFH R6+R3- TH17	0.395458	3.56002e-05
TOTAL CD4 R0+ 27+ TCM TFH R6+R3- TH17 CCR5 MFI	0.250706	0.0106411
TOTAL CD4 R0+ 27+ TTM	-0.233674	0.0175213
TOTAL CD4 R0+ 27+ TTM PD1 MFI	-0.263452	0.00717117
TOTAL CD4 R0+ 27+ TTM PD1	-0.248275	0.011449
CD4 LO CD95 MFI	0.359756	0.000189708
TOTAL CD4 R0+ 27+ PD1	-0.201237	0.0415186
TOTAL CD4 R0+ 27- EM	0.262941	0.0072881
TOTAL CD4 R0+ 27- EM PD1	-0.253626	0.00973714
TOTAL CD4 R0- 27- EFF CCR5 MFI	0.283059	0.00376538
TOTAL CD4 R0- 27- EFF CD95 MFI	0.212958	0.030792
TOTAL CD4 R0- 27- EFF CCR5	0.262066	0.00749251
TOTAL CD4 R0- 27- EFF PD1	-0.206474	0.036393
DN/CD80-FcRL4-IL-21R-Ki67-PDL1- %	-0.209978	0.0332683
DN CD21-/CD80 %	0.217763	0.0271283
DN CD21-/CD80+FcRL4-IL-21R-Ki67-PDL1- %	0.234224	0.01725
DN CD21-/CD80+FcRL4-IL-21R-Ki67-PDL1+ %	0.215194	0.0290378
DN CD21-/CD80-FcRL4-IL-21R-Ki67-PDL1+ %	0.22669	0.0212993
DN CD21-/PDL1 %	0.229052	0.01995
DN/DN CD21low/CD80-FcRL4-IL-21R-Ki67-PDL1- %	-0.251937	0.0102515
DN/FcRL4 %	-0.195815	0.0474467
DN/Inflamma DN/CD80 %	0.229855	0.0195086
DN/Inflamma DN/CD80-FcRL4-IL-21R+Ki67-PDL1- %	-0.210133	0.0331351
DN/Inflamma DN/CD80-FcRL4-IL-21R-Ki67-PDL1- %	-0.266245	0.00656046
Mature/FcRL4 %	-0.220263	0.0253727
AM/FcRL4 %	-0.196211	0.0469914
AM/Ki67 %	0.196921	0.0461843
swAM/FcRL4 %	-0.218285	0.026753
unswAM/PDL1 %	0.238854	0.015107
Total Memory/FcRL4 %	-0.218182	0.0268267
Total Memory/Ki67 %	0.216115	0.0283407
CD20/FcRL4 %	-0.220451	0.0252449
RM/FcRL4 %	-0.201783	0.0409578
swRM/FcRL4 %	-0.221183	0.0247522
swRM/Ki67 %	0.22244	0.0239243
Naive/CD80 %	0.245527	0.0124259
Naive/FcRL4 %	-0.207866	0.035123
Transitional B cells/CD80 %	0.262541	0.00738081
Transitional B cells/Ki67 %	0.307449	0.0015827
Transitional B cells/PDL1 %	0.201372	0.0413795
DN/CD80 %	0.205381	0.0374158
NCM	0.307304	0.00159127
NCM CD11B X3+ R2-	0.218629	0.0265088
IM	0.220813	0.0250004

## Sheet: Supplementary Table 4
Supplementary Table 4. Spearman correlation results for univariate analysis of parameter with age in HIV.
Immune Parameter	Coefficient	p value
sVCAM	0.250203	0.009689
sCD163	0.258554	0.00744895
sTNFrI	0.232358	0.0165383
sTNFRII	0.219567	0.0237315
CD4/T CM/TFH HLA-DR MFI	0.328813	0.000578693
CD4/T CM/TFH ICOS MFI	-0.27627	0.00414822
CD4/T CM/TFH CD38 MFI	-0.214106	0.0275355
CD4/T CM/TFH/HLADR (%)	0.33337	0.000479399
CD4/T CM/TFH/ICOS (%)	-0.244055	0.011697
CD4/CD38 (%)	-0.334595	0.000455536
CD4/T CM/TFH/ CD38- , HLADR+ (%)	0.393897	2.95e-05
CD4/T CM/TFH/ CD38+ , HLADR- (%)	-0.293785	0.00223871
CD4/T CM/TFH/TH1 HLA-DR MFI	0.331293	0.000522531
CD4/T CM/TFH/TH1 ICOS MFI	-0.261874	0.00669426
CD4/HLADR (%)	0.467655	4.32e-07
CD4/T CM/TFH/TH1/HLADR (%)	0.316547	0.000946879
CD4/T CM/TFH/TH1/ICOS (%)	-0.243245	0.0119872
CD4/T CM/TFH/TH1/ CD38- , HLADR+ (%)	0.341637	0.000338208
CD4/T CM/TFH/TH1/ CD38+ , HLADR- (%)	-0.260051	0.00709991
CD4/ICOS (%)	-0.215545	0.0264857
CD4/T CM/TFH/TH1-TH17 HLA-DR MFI	0.300244	0.00176586
CD4/T CM/TFH/TH1-TH17 ICOS MFI	-0.279359	0.00373108
CD4/T CM/TFH/TH1-TH17/HLADR (%)	0.222686	0.0217674
CD4/T CM/TFH/TH1-TH17/ICOS (%)	-0.291284	0.00245062
CD4/T CM/TFH/TH1-TH17/ CD38- , HLADR+ (%)	0.306634	0.00138895
CD4/T CM/TFH/TH1-TH17/ CD38+ , HLADR- (%)	-0.216086	0.0261002
CD4/T CM/TFH/TH2 HLA-DR MFI	0.302463	0.00162558
CD4/T CM/TFH/TH2 ICOS MFI	-0.292446	0.00235005
CD4/T CM/TFH/TH2 CD38 MFI	-0.234852	0.0153815
CD4/T CM/TFH/TH2/HLADR (%)	0.316125	0.000962707
CD4/T CM/TFH/TH2/ICOS (%)	-0.27548	0.00426139
CD4/T CM/TFH/TH2/ CD38- , HLADR+ (%)	0.371632	8.77e-05
CD4/T CM/TFH/TH2/ CD38+ , HLADR- (%)	-0.28679	0.00287728
CD4/T CM/TFH/TH17 HLA-DR MFI	0.318811	0.000865975
CD4/T CM/TFH/TH17 ICOS MFI	-0.348021	0.000256608
CD4/T CM/TFH/TH17 CD38 MFI	-0.272826	0.00466218
CD4/T CM/TFH/TH17/CD38 (%)	-0.243829	0.0117772
CD4/T CM/TFH/TH17/HLADR (%)	0.292737	0.00232539
CD4/T CM/TFH/TH17/ICOS (%)	-0.336476	0.000420987
CD4/T CM/TFH/TH17/ CD38- , HLADR+ (%)	0.372691	8.34e-05
CD4/T CM/TFH/TH17/ CD38+ , HLADR- (%)	-0.328234	0.000592575
CD4/T TM HLA-DR MFI	0.331538	0.000517274
CD4/T TM ICOS MFI	-0.203581	0.0363384
CD4/T TM/HLADR (%)	0.366068	0.000113827
CD4/T CM HLA-DR MFI	0.244006	0.0117145
CD4/T TM/ CD38- , HLADR+ (%)	0.367904	0.000104506
CD4/T TM/ CD38+ , HLADR- (%)	-0.336695	0.00041712
CD4/T TM/ CD38- , HLADR- (%)	-0.330637	0.000536878
CD4/ CD38- , HLADR+ (%)	0.498567	5.36e-08
CD4/ CD38+ , HLADR- (%)	-0.394455	2.86e-05
CD4/T CM ICOS MFI	-0.201081	0.038746
CD4/T NAIVE HLA-DR MFI	0.277147	0.00402572
CD4/T NAIVE ICOS MFI	-0.254366	0.00850752
CD4/T NAIVE CD38 MFI	-0.209562	0.031084
CD4/T NAIVE/HLADR (%)	0.406132	1.56e-05
CD4/T NAIVE/ICOS (%)	-0.239504	0.0134094
CD4/T NAIVE/ CD38- , HLADR+ (%)	0.424343	5.81e-06
CD4T CM CD38 MFI	-0.231728	0.0168426
CD4/T NAIVE/ CD38+ , HLADR+ (%)	0.270157	0.00509866
CD4/T NAIVE/ CD38+ , HLADR- (%)	-0.246889	0.0107302
CD4/T EFF ICOS MFI	-0.332155	0.000504215
CD4/T EFF CD38 MFI	-0.254783	0.00839655
CD4/T EFF/CD38 (%)	-0.282292	0.00337022
CD4/T EFF/ICOS (%)	-0.278263	0.00387463
CD4/T EFF/KI67 (%)	-0.235024	0.0153043
CD4/T EFF/ CD38- , HLADR+ (%)	0.239646	0.0133529
CD4/T EFF/ CD38+ , HLADR+ (%)	-0.193257	0.0471592
CD4/T EFF/ CD38+ , HLADR- (%)	-0.351218	0.000222969
CD4/T EM HLA-DR MFI	0.286257	0.00293209
CD4/T EM ICOS MFI	-0.362868	0.000131937
CD4/TCM/CD38 (%)	-0.216428	0.0258592
CD4/T EM/HLADR (%)	0.308792	0.00127924
CD4/T EM/ICOS (%)	-0.313438	0.0010693
CD4/T EM/ CD38- , HLADR+ (%)	0.328309	0.000590761
CD4/T EM/ CD38+ , HLADR- (%)	-0.293508	0.00226132
CD4/T CM/HLADR (%)	0.281705	0.00343975
CD4/T EM/ CD38- , HLADR- (%)	-0.272616	0.00469523
CD8 HLA-DR MFI	0.351291	0.000222256
CD8 ICOS MFI	-0.251368	0.00934477
CD8 CD38 MFI	-0.360556	0.000146655
CD8/CD38 (%)	-0.304716	0.00149357
CD8/HLADR (%)	0.348708	0.000249008
CD4/T CM/ICOS (%)	-0.217248	0.0252882
CD8/PD1 (%)	0.218416	0.0244937
CD8/T CM CD38 MFI	-0.383176	5.03e-05
CD8/T CM PD1 MFI	0.37003	9.46e-05
CD8/T CM/CD38 (%)	-0.353125	0.000204903
CD8/T CM/HLADR (%)	0.245209	0.0112946
CD8/T CM/KI67 (%)	0.250305	0.00965839
CD8/T CM/PD1 (%)	0.32076	0.000801421
CD8/T CM/ CD38- , HLADR+ (%)	0.380816	5.65e-05
CD8/T CM/ CD38+ , HLADR+ (%)	-0.212166	0.0290062
CD8/T CM/ CD38+ , HLADR- (%)	-0.400252	2.13e-05
CD8/T TM ICOS MFI	-0.293577	0.00225566
CD8/T TM CD38 MFI	-0.247569	0.010509
CD8/T TM/CD38 (%)	-0.209649	0.0310132
CD8/T TM/HLADR (%)	0.213928	0.0276675
CD8/T TM/ CD38- , HLADR+ (%)	0.301671	0.00167445
CD8/T TM/ CD38+ , HLADR- (%)	-0.343909	0.000306758
CD4/T CM/NONTFH HLA-DR MFI	0.217593	0.0250511
CD8/ CD38- , HLADR+ (%)	0.432099	3.74e-06
CD8/ CD38+ , HLADR- (%)	-0.446981	1.56e-06
CD8/ CD45RO- , CD27+ HLA-DR MFI	0.300935	0.00172099
CD8/ CD45RO- , CD27+ ICOS MFI	-0.26186	0.00669736
CD8/ CD45RO- , CD27+ CD38 MFI	-0.357303	0.000169946
CD8/ CD45RO- , CD27+/CD38 (%)	-0.280233	0.0036201
CD8/ CD45RO- , CD27+/HLADR (%)	0.369208	9.83e-05
CD8/ CD45RO- , CD27+/PD1 (%)	0.252702	0.00896356
CD8/ CD45RO- , CD27+/ CD38- , HLADR+ (%)	0.442789	2.01e-06
CD8/ CD45RO- , CD27+/ CD38+ , HLADR- (%)	-0.380377	5.77e-05
CD8/T EFF HLA-DR MFI	0.248161	0.0103196
CD4/T CM/NONTFH CD38 MFI	-0.229008	0.0182112
CD8/T EFF ICOS MFI	-0.251864	0.00920146
CD8/T EFF/HLADR (%)	0.259298	0.00727354
CD8/T EFF/ICOS (%)	-0.236279	0.0147514
CD8/T EFF/ CD38- , HLADR+ (%)	0.324464	0.000690707
CD8/T EFF/ CD38+ , HLADR- (%)	-0.31304	0.00108597
CD8/T EM ICOS MFI	-0.291387	0.00244153
CD8/T EM CD38 MFI	-0.224872	0.020476
CD8/T EM/CD38 (%)	-0.21397	0.0276366
CD8/T EM/HLADR (%)	0.204148	0.0358107
CD8/T EM/ICOS (%)	-0.218899	0.0241716
CD4/T CM/NONTFH/CD38 (%)	-0.23351	0.0159949
CD8/T EM/ CD38- , HLADR+ (%)	0.299503	0.00181506
CD8/T EM/ CD38+ , HLADR- (%)	-0.339043	0.000377716
CD4/T CM/NONTFH/HLADR (%)	0.280095	0.00363744
CD4/T CM/NONTFH/ICOS (%)	-0.204121	0.0358359
CD4/T CM/NONTFH/ CD38- , HLADR+ (%)	0.371362	8.88e-05
CD4/T CM/NONTFH/CD38+ , HLADR- (%)	-0.324111	0.000700622
CD4/T CM/NONTFH/TH1 (%)	0.20263	0.0372398
CD4/T CM/NONTFH/TH1 ICOS MFI	-0.205678	0.0344173
CD4/T CM/NONTFH/TH1 CD38 MFI	-0.261549	0.00676501
CD4/T CM/NONTFH/TH1/CD38 (%)	-0.221312	0.0226149
CD4/T CM/NONTFH/TH1/HLA-DR (%)	0.220227	0.0233038
CD4/T CM/NONTFH/TH1/ICOS (%)	-0.208587	0.0318939
CD4/T CM/NONTFH/TH1: CD38- , HLADR+ (%)	0.341853	0.000335083
CD4/T CM/NONTFH/TH1: CD38+ , HLADR- (%)	-0.292151	0.0023752
CD4/T CM/NONTFH/TH1-TH17 HLA-DR MFI	0.240938	0.0128476
CD4/T CM/NONTFH/TH1-TH17 CD38 MFI	-0.244312	0.0116064
CD4/T CM/NONTFH/TH1-TH17/CD38 (%)	-0.23801	0.014017
CD4/T CM/NONTFH/TH1-TH17/HLA-DR (%)	0.236835	0.0145121
CD4/T CM/NONTFH/TH1-TH17/CD38- , HLADR+ (%)	0.39966	2.19e-05
CD4/T CM/NONTFH/TH1-TH17/CD38+ , HLADR- (%)	-0.295926	0.00207059
CD4 HLA-DR MFI	0.41964	7.54e-06
CD4/T CM/NONTFH/TH2 CD38 MFI	-0.290058	0.00256094
CD4/T CM/NONTFH/TH2/CD38 (%)	-0.290331	0.00253607
CD4/T CM/NONTFH/TH2/HLADR (%)	0.272129	0.00477275
CD4/T CM/NONTFH/TH2/ CD38- , HLADR+ (%)	0.375321	7.36e-05
CD4 ICOS MFI	-0.251168	0.00940287
CD4/T CM/NONTFH/TH2/ CD38+ , HLADR- (%)	-0.347159	0.000266439
CD4/T CM/NONTFH/TH17 HLA-DR MFI	0.287188	0.00283705
CD4/T CM/NONTFH/TH17 ICOS MFI	-0.240061	0.0131888
CD4/T CM/NONTFH/TH17 CD38 MFI	-0.257385	0.00773198
CD4/T CM/NONTFH/TH17/CD38 (%)	-0.245412	0.0112249
CD4/T CM/NONTFH/TH17/HLADR (%)	0.314831	0.00101278
CD4/T CM/NONTFH/TH17/ICOS (%)	-0.243158	0.0120187
CD4 CD38 MFI	-0.353738	0.000199385
CD4/T CM/NONTFH/TH17/ CD38- , HLADR+ (%)	0.385849	4.41e-05
CD4/T CM/NONTFH/TH17/ CD38+ , HLADR- (%)	-0.380759	5.66e-05
CD4/T CM/ CD38- , HLADR+ (%)	0.377279	6.7e-05
CD4/T CM/ CD38+ , HLADR- (%)	-0.342037	0.000332452
CD4 PD1 MFI	0.295859	0.00207572
CD4 TCM/TFH/KI67	0.216695	0.0256721
CD4 TCM/TFH/PD1	0.219694	0.0236489
CD4 TCM/TFH/TFR CD39 MFI	0.294689	0.00216633
CD4 TCM/TFH/TFR | BCl6 MFI	-0.192242	0.0483545
CD4 TCM/TFH/TFR CTLA4 MFI	0.211255	0.0297195
CD4 TCM/TFH/TFR/CD39	0.218932	0.0241491
CD4 TCM/TFH/TFR/CTLA4	0.206423	0.0337555
CD4 TEFF CD39 MFI	0.40458	1.7e-05
CD4 TEFF | BCl6 MFI	-0.32715	0.000619389
CD4 TEFF CTLA4 MFI	0.289535	0.00260943
CD4 TEM CD39 MFI	0.388596	3.85e-05
CD4 TEM | BCl6 MFI	-0.333669	0.000473481
CD4 TEM CTLA4 MFI	0.346418	0.000275175
CD8 CD39 MFI	0.290008	0.00256553
CD8 CTLA4 MFI	0.247185	0.0106334
CD8/KI67	-0.274921	0.00434322
CD4 CD25BRIGHT/TOTAL TREG | BCl6 MFI	-0.218674	0.0243209
CD8/NAIVE CD39 MFI	0.272421	0.00472618
CD8/NAIVE PD1 MFI	0.348962	0.000246249
CD4 CD25BRIGHT/TOTAL TREG CTLA4 MFI	0.223097	0.0215194
CD8/TCM CD39 MFI	0.364917	0.000120059
CD8/TCM CTLA4 MFI	0.27856	0.00383523
CD8/TCM/CD127	0.211613	0.0294375
CD8/TCM/KI67	-0.252685	0.00896849
CD8/TEFF CD39 MFI	0.309456	0.00124707
CD8/TEFF CTLA4 MFI	0.326966	0.000624061
CD4 CD25BRIGHT/TOTAL TREG PD1 MFI	0.227341	0.0190963
CD8/TEFF/KI67	-0.29703	0.00198847
CD8/TEM CD39 MFI	0.346716	0.000271637
CD8/TEM CTLA4 MFI	0.245983	0.0110313
CD8/TEM/KI67	-0.300742	0.00173343
CD4 CD25BRIGHT/TOTAL TREG/ACTIVATED TREG | BCl6 MFI	-0.209785	0.0309014
CD4 CD25BRIGHT/TOTAL TREG/ACTIVATED TREG CTLA4 MFI	0.25623	0.00802113
CD4 CD25BRIGHT/TOTAL TREG/ACTIVATED TREG PD1 MFI	0.214985	0.0268899
CD25BRIGHT/TOTAL TREG/KI67	0.269989	0.00512725
CD4 CTLA4	0.219814	0.0235707
CD4KI67	0.240434	0.0130427
CD4 NAIVE CD39 MFI	0.331241	0.000523658
CD4NAIVE | BCl6 MFI	-0.25616	0.00803883
CD4NAIVE CTLA4 MFI	0.205096	0.0349417
CD4 NAIVE PD1 MFI	0.304244	0.00152041
CD4 NAIVE/CD39	0.388244	3.92e-05
CD4 NAIVE/CTLA4	0.222811	0.0216918
CD4 NAIVE/KI67	0.256445	0.00796641
CD4 NAIVE/PD1	0.309071	0.00126561
CD4 TCM CD39 MFI	0.379859	5.92e-05
CD4 TCM | BCl6 MFI	-0.329359	0.000565871
CD4 TCM CTLA4 MFI	0.255898	0.00810579
CD4 CD39 MFI	0.358883	0.000158239
CD4 TCM PD1 MFI	0.220094	0.0233892
CD4 TCM/CD39	0.196709	0.0432774
CD4 TCM/CTLA4	0.24698	0.0107003
CD4 TCM/KI67	0.241694	0.0125599
CD4 TCM/NONTFH CD39 MFI	0.381926	5.35e-05
CD4 TCM/NONTFH | BCl6 MFI	-0.330816	0.000532932
CD4 TCM/NONTFH CTLA4 MFI	0.262431	0.00657449
CD4 | BCl6 MFI	-0.278409	0.00385517
CD4 TCM/NONTFH PD1 MFI	0.205248	0.034804
CD4 TCM/NONTFH/CTLA4	0.233909	0.0158104
CD4 TCM/NONTFH/KI67	0.239317	0.013484
CD4 TCM/NONTFH/MEMORY TREG CD39 MFI	0.367947	0.000104298
CD4 TCM/NONTFH/MEMORY TREG | BCl6 MFI	-0.264611	0.00612394
CD4 CTLA4 MFI	0.300898	0.00172338
CD4 TCM/NONTFH/MEMORY TREG CTLA4 MFI	0.288802	0.00267863
CD4 TCM/NONTFH/MEMORY TREG/CD39	0.200868	0.0389579
CD4 TCM/NONTFH/MEMORY TREG/KI67	0.308269	0.00130505
CD4 TCM/TFH CD39 MFI	0.379225	6.1e-05
CD4 TCM/TFH | BCl6 MFI	-0.299279	0.00183016
CD4 TCM/TFH CTLA4 MFI	0.251903	0.0091901
CD4 TCM/TFH PD1 MFI	0.262567	0.00654546
CD4 TCM/TFH/CD39	0.204704	0.0352993
CD4 TCM/TFH/CTLA4	0.220997	0.0228131
CD4/EOMES (%)	0.371811	8.7e-05
CD8/T NAIVE/2B4 (%)	0.232501	0.0164701
CD8/T NAIVE/57+28- (%)	0.212089	0.0290658
CD8/T NAIVE/CD28 (%)	0.228119	0.0186789
CD8/T NAIVE/CD57 (%)	0.343835	0.000307732
CD8/T NAIVE/TIGIT (%)	0.256528	0.00794553
CD8/2B4- (%)	-0.216729	0.0256482
CD8/PD1- (%)	-0.246011	0.011022
CD4/PD1 (%)	0.453174	1.07e-06
CD8/2B4+LAG3+PD1+TIGIT+TIM3+ (%)	0.202864	0.0370164
CD8/2B4+LAG3+PD1+TIGIT-TIM3+ (%)	0.220857	0.0229017
CD4/T CM/2B4 (%)	0.232264	0.0165836
CD8/2B4-LAG3+PD1-TIGIT-TIM3+ (%)	-0.212966	0.0283914
CD8/2B4-LAG3+PD1-TIGIT-TIM3- (%)	-0.284518	0.00311752
CD8/2B4-LAG3-PD1-TIGIT-TIM3+ (%)	-0.239726	0.0133208
CD8/2B4-LAG3-PD1-TIGIT-TIM3- (%)	-0.304068	0.00153049
CD4/T CM/CD28 (%)	-0.211356	0.0296397
CD4/T CM/EOMES (%)	0.254926	0.00835882
CD4/T CM/PD1 (%)	0.37803	6.46e-05
CD4/T EFF/EOMES (%)	0.201617	0.038219
CD4/T EM/CD57 (%)	0.198822	0.041035
CD4/T EM/EOMES (%)	0.269454	0.00521946
CD4/T EM/PD1 (%)	0.30103	0.00171491
CD4/T NAIVE/2B4 (%)	0.26411	0.00622485
CD4/T NAIVE/CD57 (%)	0.21034	0.0304509
CD4/T NAIVE/EOMES (%)	0.246165	0.0109703
CD4/T NAIVE/PD1 (%)	0.431733	3.82e-06
CD4/T NAIVE/TIGIT (%)	0.27827	0.00387361
CD4/T NAIVE/TIM3 (%)	0.241304	0.0127077
CD4/TIGIT (%)	0.365488	0.000116929
CD4/2B4 (%)	0.213579	0.0279287
CD8/2B4 (%)	0.216729	0.0256482
CD8/57+28- (%)	0.211758	0.0293235
CD8/CD57 (%)	0.256425	0.0079715
CD8/PD1 (%)	0.246244	0.0109438
CD8/T EFF/CD57 (%)	0.256448	0.00796574
CD4/CD57 (%)	0.29043	0.00252706
CD4 LO CD95	0.368525	0.000101517
TOTAL CD4 R6+R3+	0.318387	0.000880627
CD4 LO PD1	0.327087	0.00062098
TOTAL CD4 CCR5	0.220717	0.0229905
TOTAL CD4 CD3 CD27	-0.269335	0.00524022
TOTAL CD4 CD27+ CD95+ TSCM	0.265002	0.00604599
TSCM % of CD4	0.193738	0.0466021
TOTAL CD4 CD95	0.221157	0.0227121
TOTAL CD4 PD1	0.234974	0.0153266
TOTAL CD4 R0- 27+ NAIVE	-0.341207	0.000344475
TOTAL CD4 R0- 27+ NAIVE CCR5 MFI	-0.248692	0.0101523
TOTAL CD4 R0- 27+ NAIVE PD1	0.227653	0.0189281
TOTAL CD4 R0+ 27+ TCM TFH CCR5	0.296989	0.00199145
CD4 LO	-0.24715	0.0106448
TOTAL CD4 R0+ 27+ TCM TFH R6- R3+ TH1	0.242972	0.0120861
TOTAL CD4 R0+ 27+ TCM TFH R6+R3+	0.290914	0.00248343
TOTAL CD4 R0+ 27- EM	0.292723	0.00232658
TOTAL CD4 R0+ 27- EM CD95 MFI	-0.223802	0.0210994
CD4 LO CCR5	0.409091	1.34e-05
TOTAL CD4 R0- 27- EFF CCR5 MFI	0.196795	0.0431847
TOTAL CD4 R6-R3+	0.346856	0.000269984
TOTAL CD4 R6-R3+ CCR5	0.253835	0.00865067
DN/CD80+FcRL4-IL-21R-Ki67-PDL1- %	-0.198537	0.0413315
DN/CD80-FcRL4+IL-21R+Ki67+PDL1- %	-0.19715	0.0428012
DN/CD80-FcRL4+IL-21R+Ki67-PDL1- %	-0.255986	0.00808331
DN/CD80-FcRL4+IL-21R-Ki67-PDL1- %	-0.29948	0.00181663
DN/CD80-FcRL4-IL-21R+Ki67-PDL1- %	-0.210434	0.0303746
DN CD21- %	-0.197857	0.0420475
DN CD21-/CD80+FcRL4+IL-21R+Ki67-PDL1- %	-0.223207	0.0214538
DN CD21-/CD80+FcRL4+IL-21R-Ki67+PDL1- %	-0.213745	0.0278043
DN CD21-/CD80+FcRL4+IL-21R-Ki67+PDL1+ %	-0.212553	0.0287074
DN CD21-/CD80+FcRL4+IL-21R-Ki67-PDL1- %	-0.241183	0.0127539
DN CD21-/CD80-FcRL4+IL-21R+Ki67+PDL1- %	-0.19715	0.0428012
CD20+/CD80+	-0.285523	0.00300916
DN CD21-/CD80-FcRL4+IL-21R+Ki67-PDL1- %	-0.250496	0.00960124
DN CD21-/CD80-FcRL4+IL-21R-Ki67-PDL1- %	-0.305737	0.00143704
DN CD21-/CD80-FcRL4-IL-21R+Ki67-PDL1- %	-0.207384	0.032918
DN CD21-/FcRL4 %	-0.278564	0.00383475
DN/DN CD21low/CD80+FcRL4+IL-21R+Ki67-PDL1- %	-0.224943	0.0204351
DN/DN CD21low/CD80+FcRL4+IL-21R-Ki67+PDL1- %	-0.21337	0.0280857
DN/DN CD21low/CD80+FcRL4+IL-21R-Ki67+PDL1+ %	-0.211958	0.0291679
DN/DN CD21low/CD80+FcRL4+IL-21R-Ki67-PDL1- %	-0.24468	0.0114775
CD20/CD80+FcRL4+IL-21R+Ki67-PDL1- %	-0.228008	0.018738
DN/DN CD21low/CD80+FcRL4-IL-21R-Ki67-PDL1- %	-0.203861	0.0360775
DN/DN CD21low/CD80-FcRL4+IL-21R+Ki67+PDL1- %	-0.19715	0.0428012
DN/DN CD21low/CD80-FcRL4+IL-21R+Ki67-PDL1- %	-0.255821	0.00812568
DN/DN CD21low/CD80-FcRL4+IL-21R-Ki67-PDL1- %	-0.301523	0.00168373
DN/DN CD21low/CD80-FcRL4-IL-21R+Ki67-PDL1- %	-0.252015	0.00915801
CD20/CD80+FcRL4+IL-21R-Ki67+PDL1- %	-0.21522	0.0267197
DN/DN CD21low/IL-21R %	-0.254515	0.00846778
DN/FcRL4 %	0.268213	0.00543919
CD20/CD80+FcRL4+IL-21R-Ki67+PDL1+ %	-0.214202	0.0274641
DN/Inflamma DN/CD80 %	-0.298313	0.00189673
DN/Inflamma DN/CD80+FcRL4+IL-21R+Ki67-PDL1- %	-0.22426	0.0208304
DN/Inflamma DN/CD80+FcRL4+IL-21R-Ki67+PDL1- %	-0.21414	0.0275102
DN/Inflamma DN/CD80+FcRL4+IL-21R-Ki67+PDL1+ %	-0.213332	0.0281145
DN/Inflamma DN/CD80+FcRL4+IL-21R-Ki67-PDL1- %	-0.243717	0.0118174
CD20/CD80+FcRL4+IL-21R-Ki67-PDL1- %	-0.246207	0.0109564
DN/Inflamma DN/CD80+FcRL4-IL-21R-Ki67-PDL1- %	-0.197396	0.0425375
DN/Inflamma DN/CD80-FcRL4+IL-21R+Ki67+PDL1- %	-0.19715	0.0428012
DN/Inflamma DN/CD80-FcRL4+IL-21R+Ki67-PDL1- %	-0.254324	0.00851884
DN/Inflamma DN/CD80-FcRL4+IL-21R-Ki67-PDL1- %	-0.298794	0.00186333
DN/Inflamma DN/CD80-FcRL4-IL-21R+Ki67-PDL1- %	-0.207265	0.0330208
DN/Inflamma DN/PDL1 %	0.217678	0.024993
DN/noninfla DN/CD80 %	-0.272226	0.00475722
DN/noninfla DN/CD80+FcRL4+IL-21R+Ki67-PDL1- %	-0.224717	0.0205651
DN/noninfla DN/CD80+FcRL4+IL-21R-Ki67+PDL1- %	-0.212465	0.0287748
DN/noninfla DN/CD80+FcRL4+IL-21R-Ki67+PDL1+ %	-0.211958	0.0291679
DN/noninfla DN/CD80+FcRL4+IL-21R-Ki67-PDL1- %	-0.248392	0.0102463
CD20/CD80+FcRL4-IL-21R+Ki67-PDL1- %	-0.230599	0.0173993
DN/noninfla DN/CD80-FcRL4+IL-21R+Ki67+PDL1- %	-0.197364	0.0425719
DN/noninfla DN/CD80-FcRL4+IL-21R+Ki67-PDL1- %	-0.258132	0.00755001
DN/noninfla DN/CD80-FcRL4+IL-21R-Ki67-PDL1- %	-0.297489	0.00195517
CD20/CD80+FcRL4-IL-21R-Ki67+PDL1- %	-0.199401	0.0404382
DN/noninfla DN/FcRL4 %	0.250283	0.00966496
DN/noninfla DN/Ki67 %	0.227082	0.0192375
DN/PDL1 %	0.208403	0.0320489
Mature/FcRL4 %	0.193465	0.0469177
Mature/IL-21R %	0.243881	0.0117588
AM/CD80 %	-0.401055	2.04e-05
CD20/CD80+FcRL4-IL-21R-Ki67-PDL1- %	-0.22716	0.0191951
AM/CD80+FcRL4+IL-21R+Ki67-PDL1- %	-0.22571	0.0199985
AM/CD80+FcRL4+IL-21R-Ki67+PDL1- %	-0.216005	0.0261578
AM/CD80+FcRL4+IL-21R-Ki67+PDL1+ %	-0.211958	0.0291679
AM/CD80+FcRL4+IL-21R-Ki67-PDL1- %	-0.242454	0.0122763
AM/CD80+FcRL4-IL-21R+Ki67-PDL1- %	-0.198978	0.0408733
AM/CD80+FcRL4-IL-21R-Ki67+PDL1- %	-0.198197	0.041688
AM/CD80+FcRL4-IL-21R-Ki67-PDL1- %	-0.228439	0.0185092
AM/CD80-FcRL4+IL-21R+Ki67+PDL1- %	-0.197364	0.0425719
AM/CD80-FcRL4+IL-21R+Ki67-PDL1- %	-0.258693	0.00741576
CD20/CD80-FcRL4+IL-21R+Ki67+PDL1- %	-0.19715	0.0428012
AM/CD80-FcRL4+IL-21R-Ki67-PDL1- %	-0.314281	0.00103476
AM/CD80-FcRL4-IL-21R+Ki67-PDL1- %	-0.223479	0.021291
AM/CD80-FcRL4-IL-21R-Ki67-PDL1- %	-0.209999	0.0307267
AM/FcRL4 %	0.208926	0.0316111
swAM/CD80 %	-0.342961	0.000319531
swAM/CD80+FcRL4+IL-21R+Ki67-PDL1- %	-0.226076	0.0197931
CD20/CD80-FcRL4+IL-21R+Ki67-PDL1- %	-0.25789	0.00760858
swAM/CD80+FcRL4+IL-21R-Ki67+PDL1- %	-0.216005	0.0261578
swAM/CD80+FcRL4+IL-21R-Ki67+PDL1+ %	-0.211958	0.0291679
swAM/CD80+FcRL4+IL-21R-Ki67-PDL1- %	-0.242814	0.012144
swAM/CD80-FcRL4+IL-21R+Ki67+PDL1- %	-0.197364	0.0425719
swAM/CD80-FcRL4+IL-21R+Ki67-PDL1- %	-0.258671	0.00742098
swAM/CD80-FcRL4+IL-21R-Ki67-PDL1- %	-0.298919	0.00185474
swAM/FcRL4 %	0.199686	0.0401466
unswAM/CD80 %	-0.320629	0.00080559
unswAM/CD80+FcRL4+IL-21R+Ki67-PDL1- %	-0.226389	0.0196185
CD20/CD80-FcRL4+IL-21R-Ki67-PDL1- %	-0.312566	0.00110614
unswAM/CD80+FcRL4+IL-21R-Ki67+PDL1- %	-0.216005	0.0261578
unswAM/CD80+FcRL4+IL-21R-Ki67+PDL1+ %	-0.213424	0.0280454
unswAM/CD80+FcRL4+IL-21R-Ki67-PDL1- %	-0.23889	0.0136564
unswAM/CD80+FcRL4-IL-21R+Ki67-PDL1- %	-0.204455	0.0355275
unswAM/CD80+FcRL4-IL-21R-Ki67+PDL1- %	-0.215616	0.0264354
unswAM/CD80+FcRL4-IL-21R-Ki67-PDL1- %	-0.217695	0.0249811
unswAM/CD80-FcRL4+IL-21R+Ki67+PDL1- %	-0.197364	0.0425719
unswAM/CD80-FcRL4+IL-21R+Ki67-PDL1- %	-0.253465	0.0087518
unswAM/CD80-FcRL4+IL-21R-Ki67-PDL1- %	-0.314347	0.0010321
unswAM/CD80-FcRL4+IL-21R-Ki67-PDL1+ %	-0.194407	0.0458359
unswAM/CD80-FcRL4-IL-21R+Ki67-PDL1- %	-0.229799	0.0178037
unswAM/PDL1 %	-0.279661	0.00369235
Total Memory/CD80 %	-0.337786	0.000398373
Total Memory/CD80+FcRL4+IL-21R+Ki67-PDL1- %	-0.228804	0.0183175
Total Memory/CD80+FcRL4+IL-21R-Ki67+PDL1- %	-0.216005	0.0261578
Total Memory/CD80+FcRL4+IL-21R-Ki67+PDL1+ %	-0.213818	0.0277498
Total Memory/CD80+FcRL4+IL-21R-Ki67-PDL1- %	-0.24644	0.0108787
CD20/CD80-FcRL4-IL-21R+Ki67-PDL1- %	-0.253265	0.008807
Total Memory/CD80+FcRL4-IL-21R+Ki67-PDL1- %	-0.245652	0.0111433
Total Memory/CD80+FcRL4-IL-21R-Ki67+PDL1- %	-0.223146	0.0214901
Total Memory/CD80+FcRL4-IL-21R-Ki67-PDL1- %	-0.240667	0.0129523
Total Memory/CD80-FcRL4+IL-21R+Ki67+PDL1- %	-0.197364	0.0425719
Total Memory/CD80-FcRL4+IL-21R+Ki67-PDL1- %	-0.259057	0.00733002
Total Memory/CD80-FcRL4+IL-21R-Ki67-PDL1- %	-0.313993	0.00104645
Total Memory/CD80-FcRL4+IL-21R-Ki67-PDL1+ %	-0.191474	0.0492748
Total Memory/CD80-FcRL4-IL-21R+Ki67-PDL1- %	-0.261205	0.00684058
Total Memory/CD80-FcRL4-IL-21R-Ki67-PDL1- %	-0.21254	0.0287176
Total Memory/FcRL4 %	0.192166	0.0484455
RM/CD80 %	-0.314665	0.00101934
RM/CD80+FcRL4+IL-21R+Ki67-PDL1- %	-0.228804	0.0183175
RM/CD80+FcRL4+IL-21R-Ki67+PDL1- %	-0.214749	0.0270622
RM/CD80+FcRL4+IL-21R-Ki67+PDL1+ %	-0.214202	0.0274641
RM/CD80+FcRL4+IL-21R-Ki67-PDL1- %	-0.244945	0.0113857
RM/CD80+FcRL4-IL-21R+Ki67-PDL1- %	-0.241063	0.0127999
RM/CD80+FcRL4-IL-21R-Ki67+PDL1- %	-0.221165	0.022707
RM/CD80+FcRL4-IL-21R-Ki67-PDL1- %	-0.232097	0.016664
RM/CD80-FcRL4+IL-21R+Ki67+PDL1- %	-0.197364	0.0425719
RM/CD80-FcRL4+IL-21R+Ki67-PDL1- %	-0.259057	0.00733002
RM/CD80-FcRL4+IL-21R-Ki67-PDL1- %	-0.3142	0.00103802
RM/CD80-FcRL4-IL-21R+Ki67-PDL1- %	-0.26317	0.00641858
CD20/FcRL4 %	0.194253	0.0460111
RM/CD80-FcRL4-IL-21R-Ki67-PDL1- %	-0.210775	0.0301014
RM/FcRL4 %	0.199128	0.0407189
RM/IL-21R %	0.201887	0.0379564
CD20/IL-21R %	0.216541	0.0257794
swRM/CD80 %	0.199243	0.0406001
swRM/CD80+FcRL4+IL-21R+Ki67-PDL1- %	-0.223921	0.0210295
swRM/CD80+FcRL4+IL-21R-Ki67+PDL1- %	-0.216005	0.0261578
swRM/CD80+FcRL4+IL-21R-Ki67+PDL1+ %	-0.211958	0.0291679
swRM/CD80+FcRL4+IL-21R-Ki67-PDL1- %	-0.245161	0.0113109
swRM/CD80+FcRL4-IL-21R+Ki67-PDL1- %	-0.192279	0.0483103
swRM/CD80+FcRL4-IL-21R-Ki67-PDL1- %	-0.216495	0.0258119
swRM/CD80-FcRL4+IL-21R+Ki67+PDL1- %	-0.197364	0.0425719
swRM/CD80-FcRL4+IL-21R+Ki67-PDL1- %	-0.257956	0.00759256
swRM/CD80-FcRL4+IL-21R-Ki67-PDL1- %	-0.296612	0.00201925
swRM/CD80-FcRL4-IL-21R+Ki67-PDL1- %	-0.229318	0.0180506
Mature B cells %	0.19466	0.0455478
swRM/FcRL4 %	0.217732	0.0249565
swRM/IL-21R %	-0.269899	0.00514275
unswRM/CD80 %	0.208389	0.032061
Mature/CD80 %	-0.289194	0.00264143
unswRM/CD80+FcRL4+IL-21R+Ki67-PDL1- %	-0.22823	0.0186197
unswRM/CD80+FcRL4+IL-21R-Ki67+PDL1- %	-0.212843	0.0284854
unswRM/CD80+FcRL4+IL-21R-Ki67+PDL1+ %	-0.215347	0.0266279
unswRM/CD80+FcRL4+IL-21R-Ki67-PDL1- %	-0.244896	0.0114026
unswRM/CD80+FcRL4-IL-21R+Ki67-PDL1- %	-0.25209	0.00913679
unswRM/CD80+FcRL4-IL-21R-Ki67+PDL1- %	-0.211964	0.0291629
unswRM/CD80+FcRL4-IL-21R-Ki67-PDL1- %	-0.2178	0.02491
unswRM/CD80-FcRL4+IL-21R+Ki67+PDL1- %	-0.19715	0.0428012
unswRM/CD80-FcRL4+IL-21R+Ki67-PDL1- %	-0.258099	0.00755797
unswRM/CD80-FcRL4+IL-21R-Ki67-PDL1- %	-0.314358	0.00103166
unswRM/CD80-FcRL4+IL-21R-Ki67-PDL1+ %	-0.192504	0.0480439
unswRM/CD80-FcRL4-IL-21R+Ki67-PDL1- %	-0.261581	0.00675796
Mature/CD80+FcRL4+IL-21R+Ki67-PDL1- %	-0.227891	0.0188006
unswRM/FcRL4 %	0.199908	0.039921
Naive/CD80 %	-0.278204	0.00388247
Naive/CD80+FcRL4+IL-21R+Ki67-PDL1- %	-0.22809	0.0186943
Naive/CD80+FcRL4+IL-21R-Ki67+PDL1- %	-0.215302	0.0266606
Naive/CD80+FcRL4+IL-21R-Ki67+PDL1+ %	-0.215164	0.0267603
Naive/CD80+FcRL4+IL-21R-Ki67-PDL1- %	-0.246234	0.0109472
Naive/CD80+FcRL4-IL-21R+Ki67-PDL1- %	-0.225645	0.0200349
Mature/CD80+FcRL4+IL-21R-Ki67+PDL1- %	-0.21522	0.0267197
Naive/CD80+FcRL4-IL-21R-Ki67-PDL1- %	-0.2075	0.0328182
Naive/CD80-FcRL4+IL-21R+Ki67+PDL1- %	-0.197364	0.0425719
Naive/CD80-FcRL4+IL-21R+Ki67-PDL1- %	-0.257921	0.00760115
Mature/CD80+FcRL4+IL-21R-Ki67+PDL1+ %	-0.214202	0.0274641
Naive/CD80-FcRL4+IL-21R-Ki67-PDL1- %	-0.314024	0.00104516
Naive/CD80-FcRL4-IL-21R+Ki67-PDL1- %	-0.24187	0.0124937
Mature/CD80+FcRL4+IL-21R-Ki67-PDL1- %	-0.246121	0.0109851
Naive/IL-21R %	0.272757	0.00467292
Naive/PDL1 %	0.27288	0.00465362
Transitional B cells %	-0.221883	0.0222595
Transitional B cells/FcRL4 %	0.21841	0.0244978
Transitional B cells/IL-21R %	0.240381	0.0130632
Transitional B cells/PDL1 %	0.221396	0.0225621
Ratio Mem/DN	0.226425	0.0195986
Mature/CD80+FcRL4-IL-21R+Ki67-PDL1- %	-0.230832	0.0172831
Mature/CD80+FcRL4-IL-21R-Ki67+PDL1- %	-0.199625	0.0402093
Mature/CD80+FcRL4-IL-21R-Ki67-PDL1- %	-0.229677	0.0178659
Mature/CD80-FcRL4+IL-21R+Ki67+PDL1- %	-0.197364	0.0425719
Mature/CD80-FcRL4+IL-21R+Ki67-PDL1- %	-0.25789	0.00760858
Mature/CD80-FcRL4+IL-21R-Ki67-PDL1- %	-0.312086	0.0011269
Mature/CD80-FcRL4-IL-21R+Ki67-PDL1- %	-0.255569	0.00819053
DN/CD80 %	-0.269326	0.00524181
DN/CD80+FcRL4+IL-21R+Ki67-PDL1- %	-0.225256	0.0202559
DN/CD80+FcRL4+IL-21R-Ki67+PDL1- %	-0.21414	0.0275102
DN/CD80+FcRL4+IL-21R-Ki67+PDL1+ %	-0.213332	0.0281145
DN/CD80+FcRL4+IL-21R-Ki67-PDL1- %	-0.246508	0.0108559
NCM CD11B X3- R2-	-0.194135	0.0461459
CD14+ MONOCYTES	0.306584	0.00139156
IM	0.33789	0.000396624
MONO CD11B	0.288634	0.00269479
